# Supplementary material for: Future population exposures to unprecedented climatic risks
Source: Research Square preprint supplement (doi:10.21203/rs.3.rs-101046/v1), 2020-11-09
Supplement: Supplementary file 1 [file 165057fc672653fc2b42f4f8.docx]

**Supplementary Information**

**Future population exposures to unprecedented climatic risks**

Taichi Sano1, Taikan Oki1,2*

1Department of Civil Engineering

Graduate School of Engineering

The University of Tokyo

7-3-1 Hongo, Bunkyo-ku

Tokyo 113-8656, Japan

2Rector’s Office

United Nations University

5–53–70 Jingumae, Shibuya-ku

Tokyo 150-8925, Japan

*Corresponding author

Telephone: +81 3 5841-0504

Email: oki@civil.t.u-tokyo.ac.jp


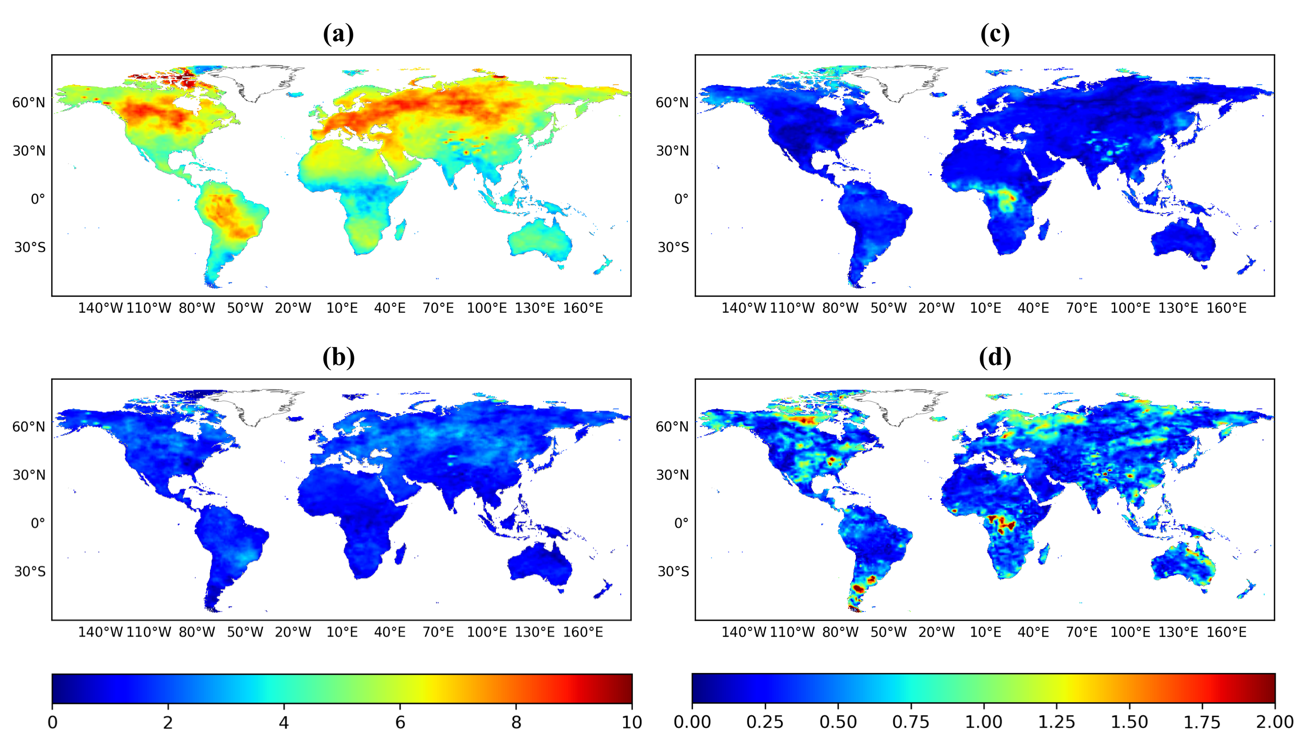


**Supplementary Figure 1 | Projected multi-model average change in the 20-year temperature from 1980–2009 to 2070–2099 and coefficients of variation.** (**a**) The change under the RCP8.5-SSP5 scenario. (**b**) The change under the RCP2.6-SSP1 scenario. (**c**) The coefficient of variation under the RCP8.5-SSP5 scenario. (**d**) The coefficient of variation under the RCP2.6-SSP1 scenario.


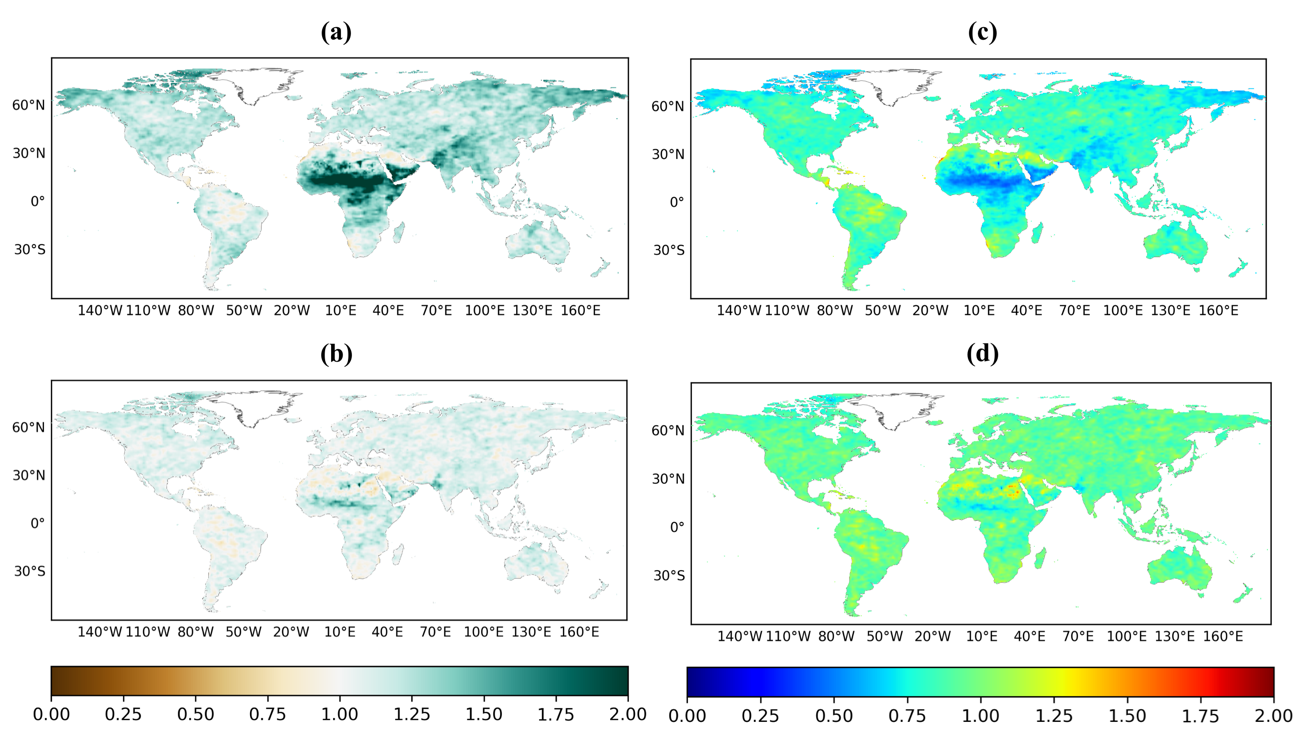


**Supplementary Figure 2 | Projected multi-model average change in the 20-year precipitation from 1980–2009 to 2070–2099 and coefficients of variation.** (**a**) The change under the RCP8.5-SSP5 scenario. (**b**) The change under the RCP2.6-SSP1 scenario. (**c**) The coefficient of variation under the RCP8.5-SSP5 scenario. (**d**) The coefficient of variation under the RCP2.6-SSP1 scenario.


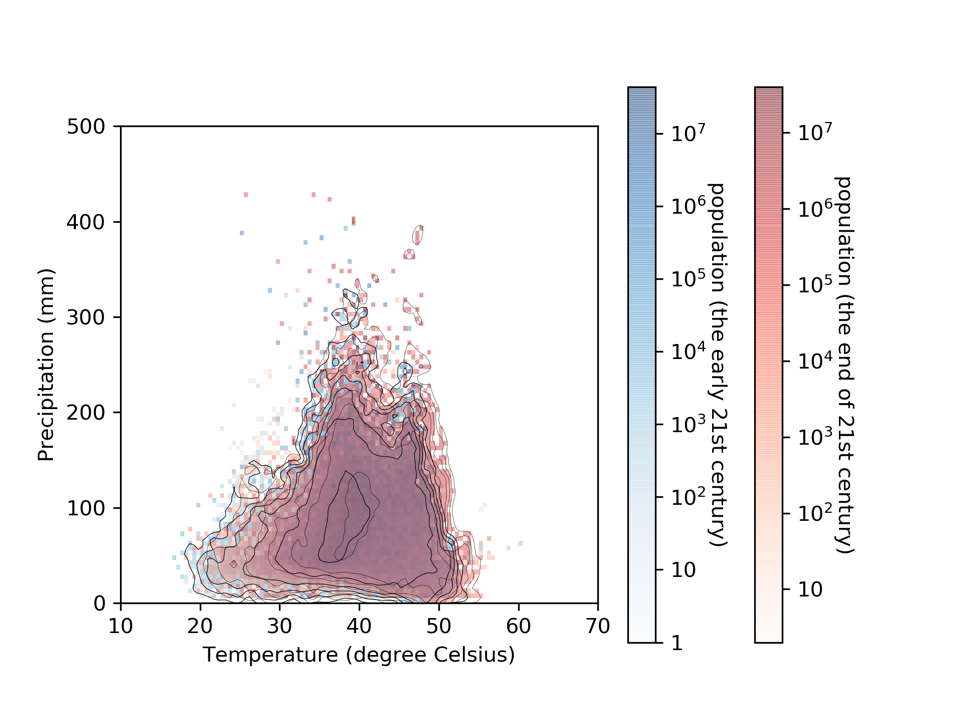


**Supplementary Figure 3 | Projected change in the population exposed to extreme weather risks.** Two-dimensional histogram representing the population exposed to the combination extreme weather risks, calculated based on the 20-year temperature and precipitation data, divided by intervals of 0.5 °C and 10 mm, respectively. The blue and red histograms show the results for 1980–2009 and 2070–2099, respectively. These data were obtained under the RCP2.6-SSP1 scenario.


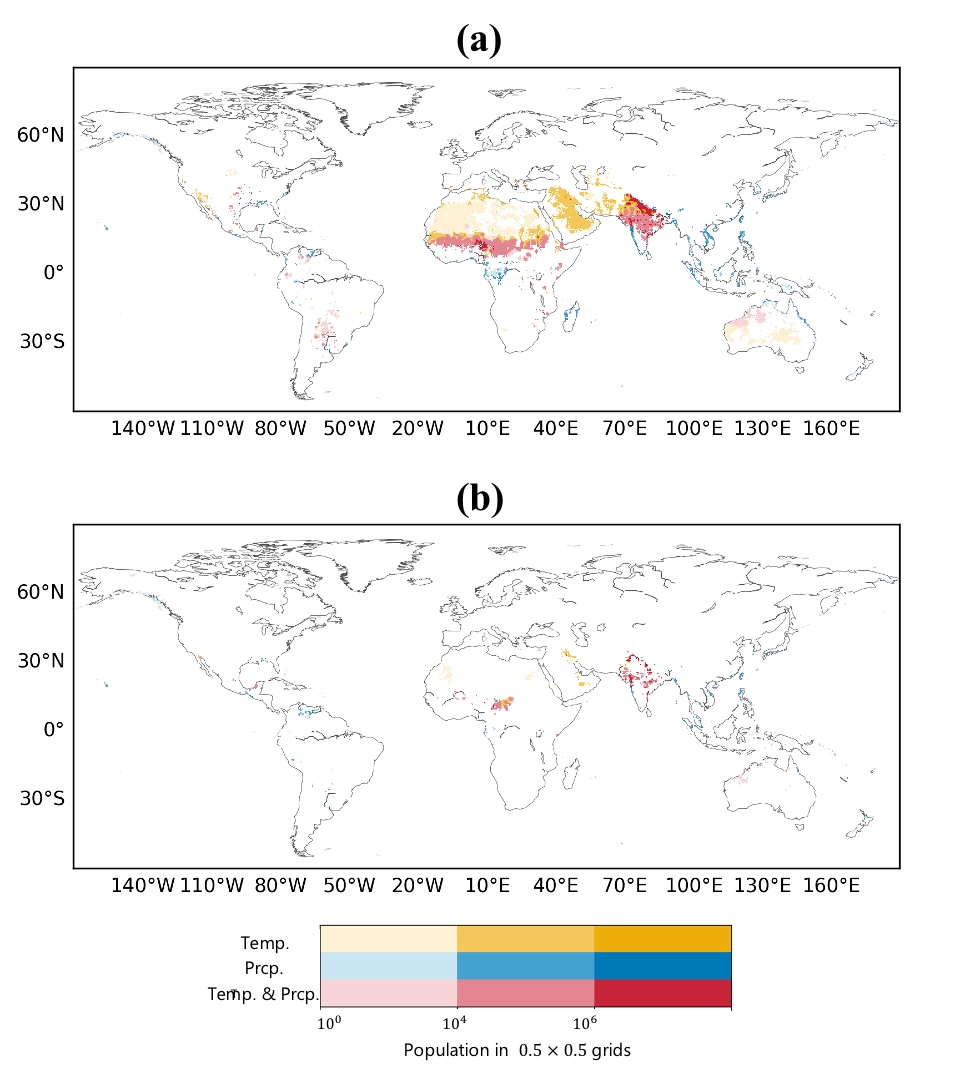


**Supplementary Figure 4 | Projected population expected to overstep the climatic risk boundaries and be exposed to unprecedented extreme climatic risks, and its geographic distribution.** People in the yellow grid will be exposed to unprecedented extreme temperature risks, people in the blue grid will be exposed to unprecedented extreme precipitation risks, and people in the red grid will be exposed to unprecedented extreme climatic risks (both extreme temperature and extreme precipitation). The deepest color represents the grids in which more than people live, the second-deepest color represents the grids in which more than people live, and the lightest color represents the grids in which at least 1 person lives. The resolution of a grid is 0.5° longitudinally and latitudinally, i.e. approximately 50 km × 50 km. (**a**) Map for the RCP8.5-SSP5 scenario. (**b**) Map for the RCP2.6-SSP1 scenario.


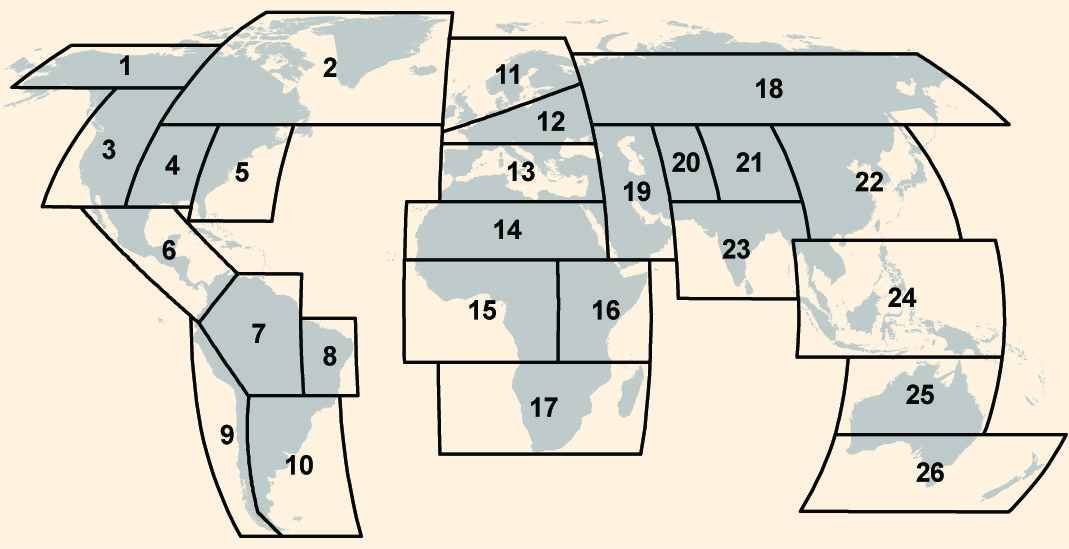


**Supplementary Figure 5 | Map showing the ‘SREX’ regions (Figure3-1) for the regional climatic risk boundaries. (IPCC, 2012)**


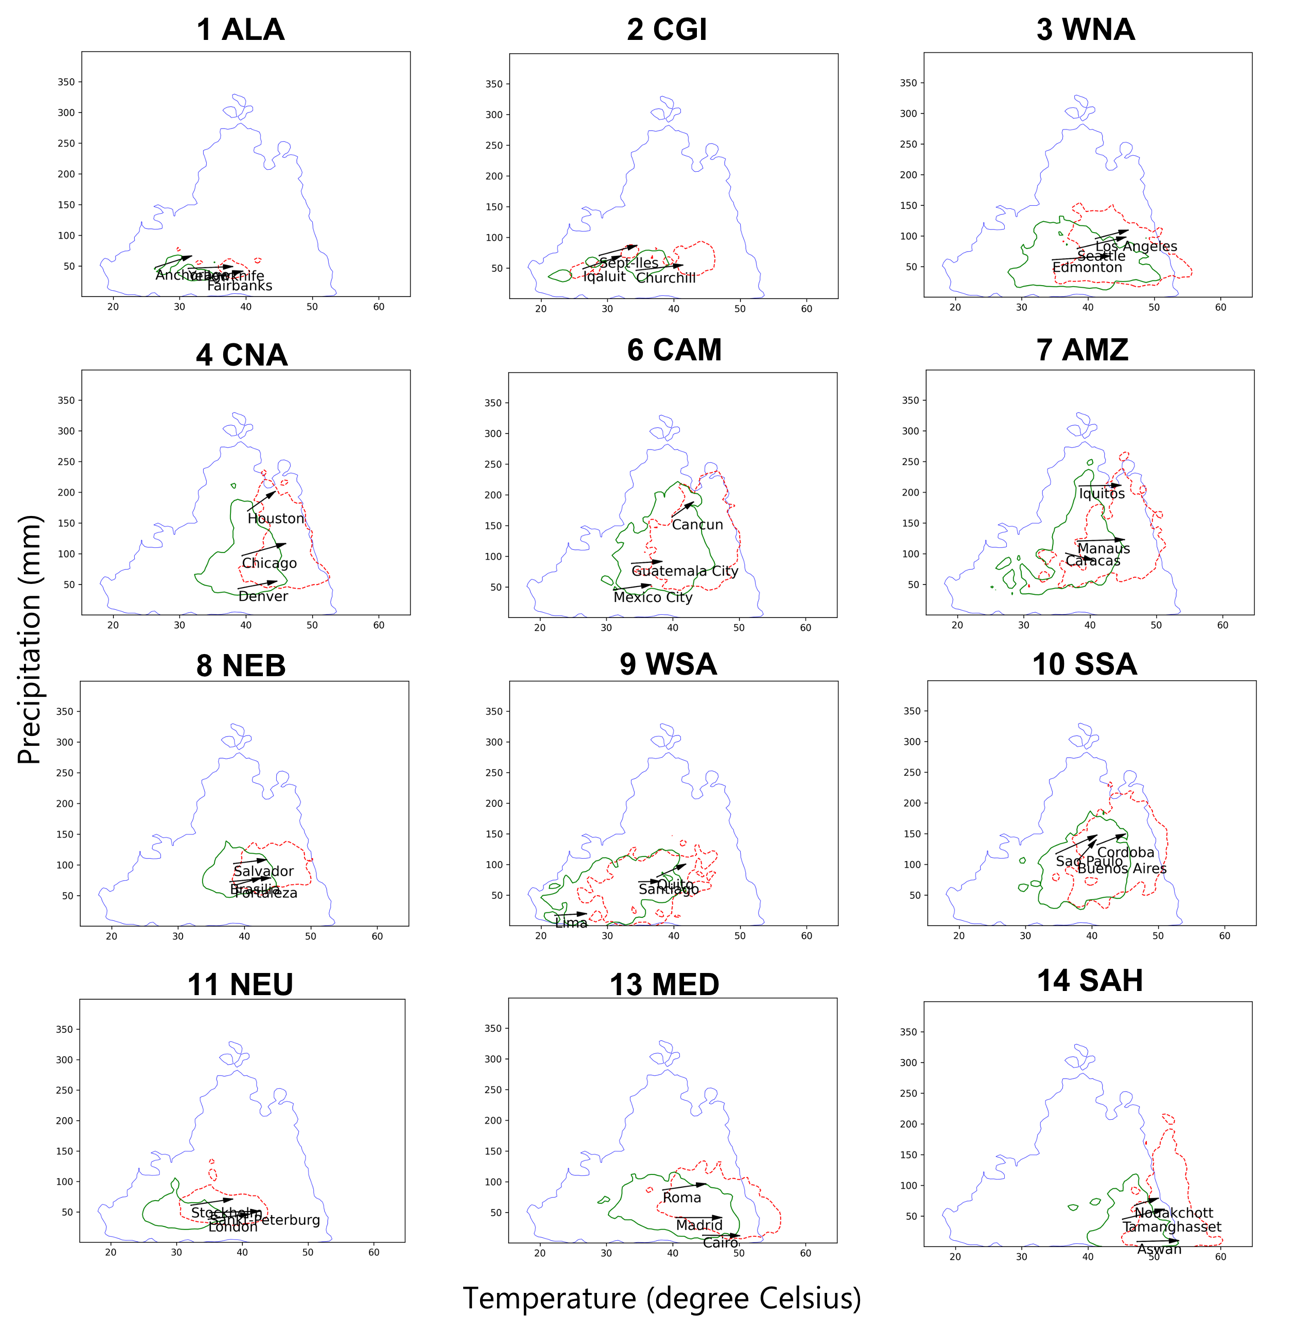


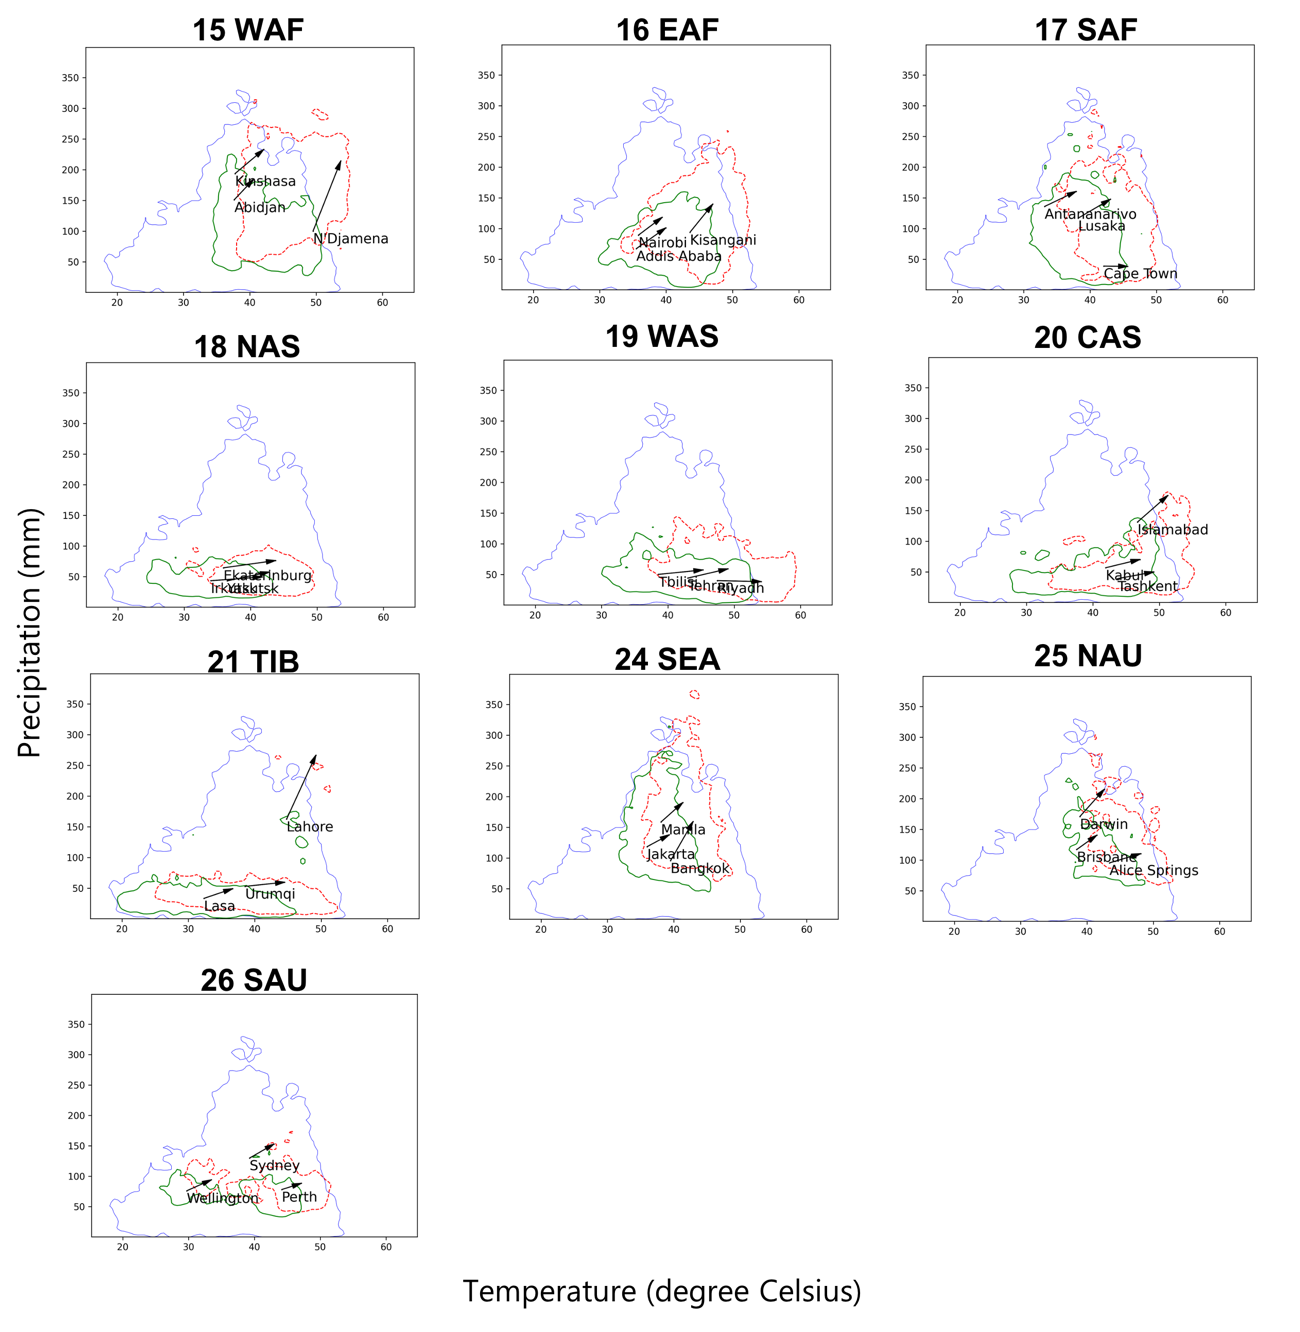


**Supplementary Figure 6 |** **Projected regional climatic risk boundaries.** The numbers in the figure correspond to the IPCC SREX regional classification. The blue, green, and red lines represent a climatic risk boundary for humanity as a whole, a current regional climatic risk boundary, and a future regional climatic risk boundary, respectively.

**Supplementary Table 1 | The correspondence relation among region ID, abbreviation and regional representation.**

| Region ID | Abbreviation | Regional representation |
| --- | --- | --- |
| 1 | ALA | Alaska/Northwest Canada |
| 2 | CGI | East Canada, Greenland, Iceland |
| 3 | WNA | West North America |
| 4 | CNA | Central North America |
| 5 | ENA | East North America |
| 6 | CAM | Central America and Mexico |
| 7 | AMZ | Amazon |
| 8 | NEB | Northeastern Brazil |
| 9 | WSA | West coast of South America |
| 10 | SSA | Southeastern South America |
| 11 | NEU | Northern Europe |
| 12 | CEU | Central Europe |
| 13 | MED | Southern Europe and Mediterranean |
| 14 | SAH | Sahara |
| 15 | WAF | West Africa |
| 16 | EAF | East Africa |
| 17 | SAF | Southern Africa |
| 18 | NAS | North Asia |
| 19 | WAS | West Asia |
| 20 | CAS | Central Asia |
| 21 | TIB | Tibetan Plateau |
| 22 | EAS | East Asia |
| 23 | SAS | South Asia |
| 24 | SEA | Southeast Asia |
| 25 | NAU | North Australia |
| 26 | SAU | South Australia/New Zealand |

**Supplementary Table 2 | Total population and population (million) under unprecedented extreme climatic risks at the end of 21st century under each scenario.**

| Scenario | RCP8.5-SSP5 | RCP2.6-SSP1 |
| --- | --- | --- |
| Under unprecedented extreme temperature risk |  |  |
| Under unprecedented extreme precipitation risk |  |  |
| Under unprecedented extreme combination (T & P) risk |  |  |
| Total |  |  |
| World population |  |  |
| Ratio of people under unprecedented extreme climatic risk |  |  |

**Supplementary Table 3 | Total population and population (million) under unprecedented extreme climatic risks at the end of 21st century under RCP8.5- SSP 5 scenario.**

| Region ID | T | P | T & P | Total | Population | Ratio |
| --- | --- | --- | --- | --- | --- | --- |
| 1 ALA | 0 | 0.0127 | 0 | 0.0127 | 1.30 | 0.973% |
| 2 CGI | 0 | 0 | 0 | 0 | 2.97 | 0% |
| 3 WNA | 0 | 0.864 | 0 | 0.864 | 389 | 0.222% |
| 4 CNA | 0.157 | 4.75 | 12.1 | 17.0 | 242 | 7.01% |
| 5 ENA | 11.4 | 0.0265 | 0.465 | 11.9 | 187 | 6.35% |
| 6 CAM | 0.266 | 1.15 | 3.37 | 4.79 | 168 | 2.85% |
| 7 AMZ | 0.0861 | 0.836 | 0.893 | 1.81 | 56.8 | 3.20% |
| 8 NEB | 0.0497 | 0.0451 | 0 | 0.0948 | 48.8 | 0.194% |
| 9 WSA | 0 | 0.189 | 0 | 0.189 | 30.7 | 0.616% |
| 10 SSA | 0.148 | 2.03 | 1.99 | 4.16 | 122 | 3.41% |
| 11 NEU | 0 | 0 | 0 | 0 | 219 | 0% |
| 12 CEU | 0 | 0 | 0 | 0 | 440 | 0% |
| 13 MED | 33.7 | 0 | 0.146 | 33.8 | 401 | 8.45% |
| 14 SAH | 47.6 | 0 | 11.2 | 58.8 | 94.9 | 61.9% |
| 15 WAF | 16.2 | 59.8 | 288 | 364 | 876 | 41.6% |
| 16 EAF | 10.4 | 3.65 | 31.1 | 45.2 | 569 | 7.94% |
| 17 SAF | 0.0483 | 3.91 | 4.56 | 8.53 | 226 | 3.76% |
| 18 NAS | 0 | 0.000270 | 0 | 0.000270 | 62.0 | 0.000436% |
| 19 WAS | 104 | 0 | 0 | 104 | 244 | 42.8% |
| 20 CAS | 63.6 | 0 | 86.4 | 150 | 242 | 62.0% |
| 21 TIB | 2.18 | 1.88 | 29.7 | 33.8 | 52.9 | 63.9% |
| 22 EAS | 0 | 52.6 | 0.817 | 53.4 | 842 | 6.35% |
| 23 SAS | 7.64 | 73.6 | 619 | 769 | 1360 | 56.4% |
| 24 SEA | 0.0293 | 57.0 | 0.215 | 57.3 | 401 | 14.3% |
| 25 NAU | 0.0646 | 1.58 | 0.116 | 1.76 | 11.9 | 14.8% |
| 26 SAU | 0.0417 | 0.481 | 0 | 0.522 | 59.5 | 0.878% |
